# Supplementary material
Source: Royal Society of Chemistry journal article supplement (doi:10.1039/d6tc00733c)
Supplement: d6tc00733c1.pdf [file d6tc00733c1.pdf]

Supplementary Information

## Synergistic mesoporous silica confinement and PMMA encapsulation enabling highly stable CsPbX<sub>3</sub> composite films for wide-color-gamut backlighting

Yuxin Pan, Guangrui Shi, Zhen Bao\*, and Qi Liu\*

Jiangsu Key Laboratory of Advanced Catalytic Materials and Technology, Advanced Catalysis Green Manufacturing Collaborative Innovation Center, and School of Petrochemical Engineering, Changzhou University, Changzhou 213164 Jiangsu, China.

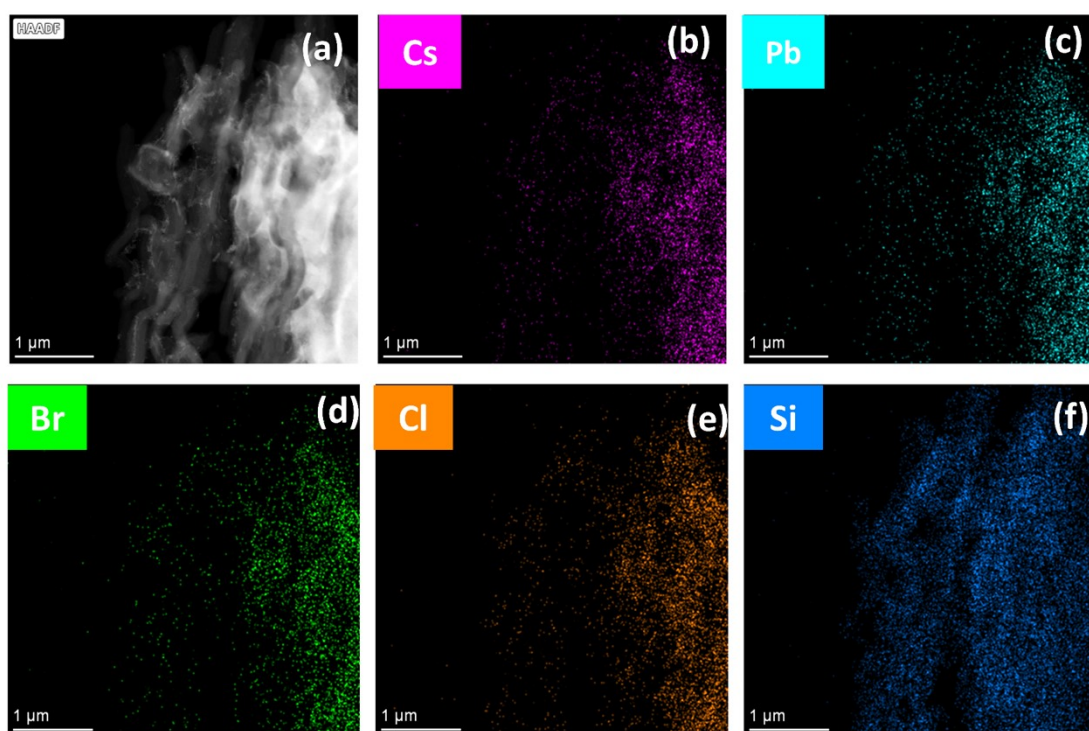

**Fig. S1** (a-f) TEM image and EDS elemental mapping images of Cs, Pb, Cl, Br, and Si in B-SBA.

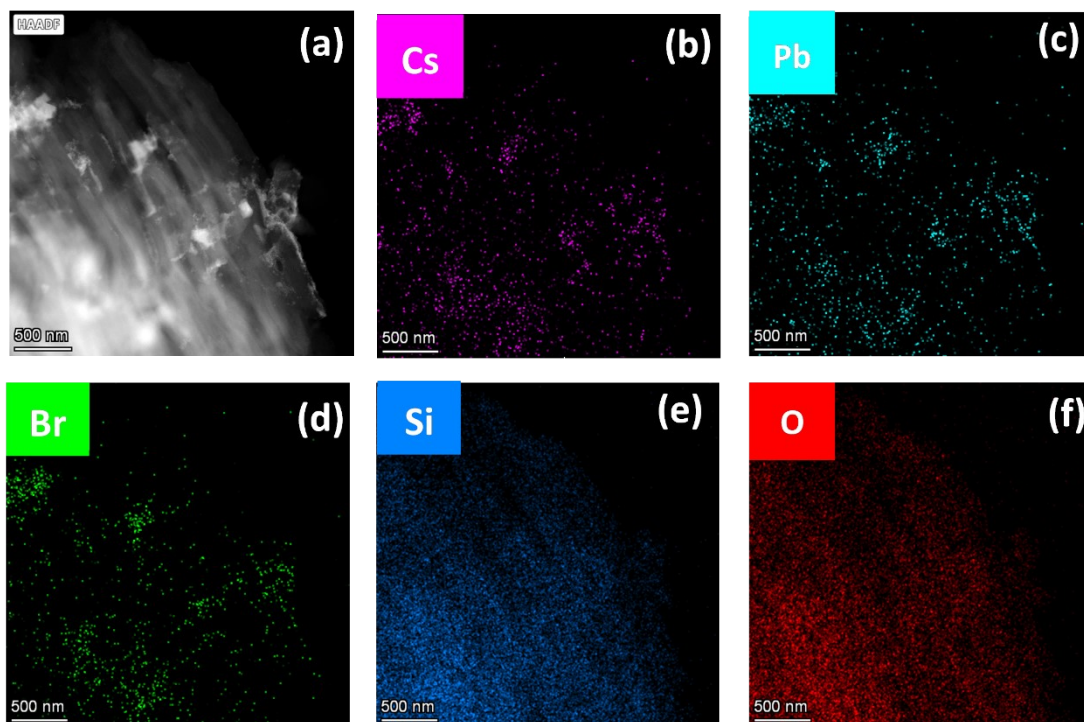

**Fig. S2** (a-f) TEM image and EDS elemental mapping images of Cs, Pb, Br, Si, and O in G-SBA.

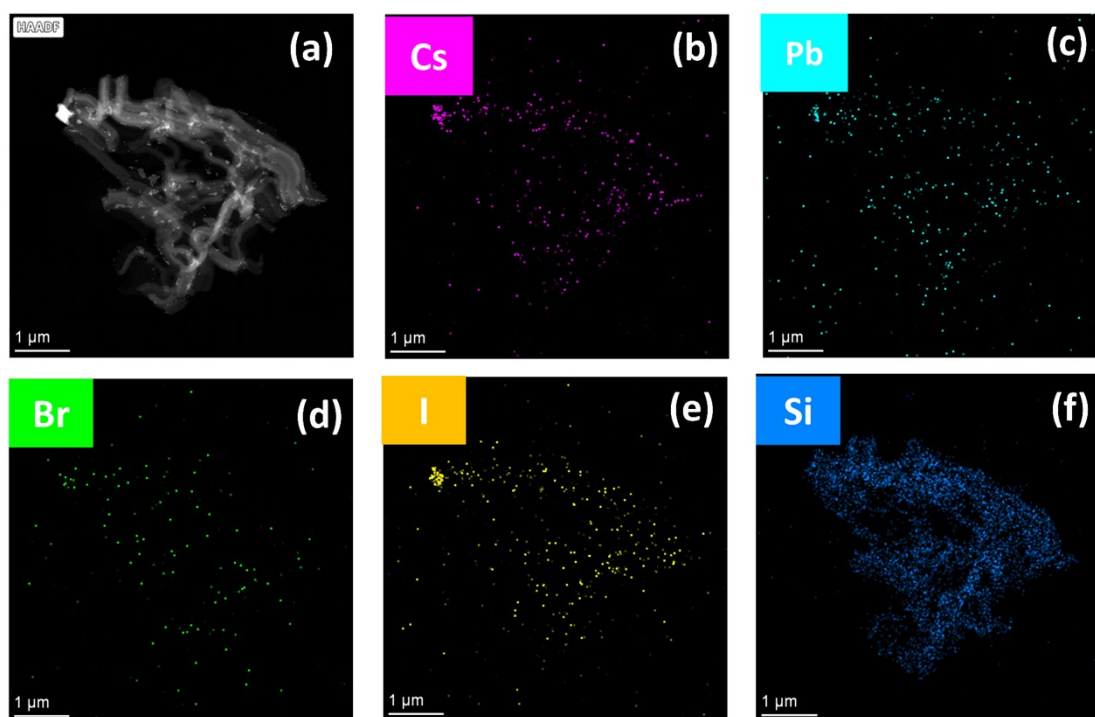

**Fig. S3** (a-f) TEM image and EDS elemental mapping images of Cs, Pb, Br, I, and Si in R-SBA.

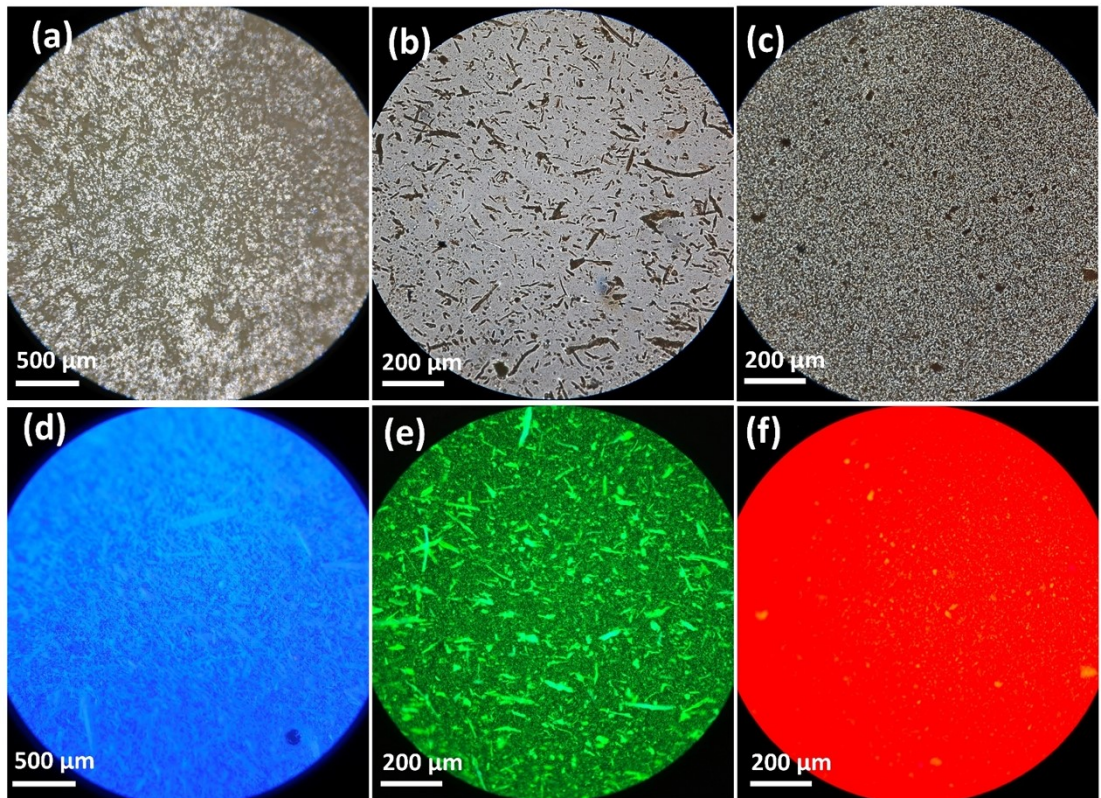

Fig. S4 Optical microscope images of (a-c) B-SBA/PMMA, G-SBA/PMMA, and R-SBA/PMMA composite films and (d-f) the corresponding films under UV light illumination (365 nm).

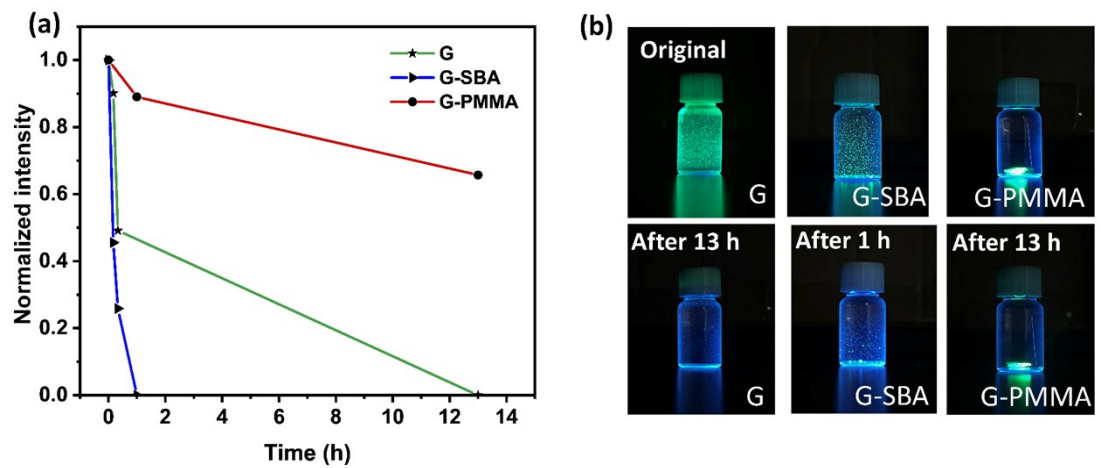

Fig. S5 (a) Time-dependent PL intensity of G, G-SBA, and G-PMMA immersed in water. (b) Photographs of G, G-SBA, and G-PMMA immersed in water.

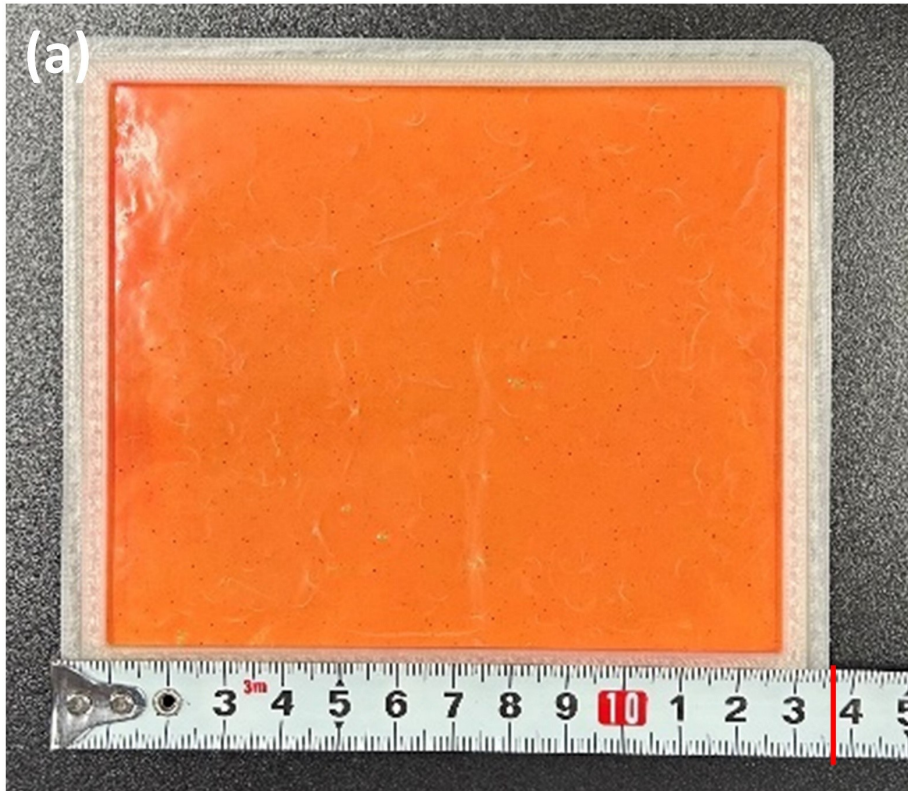

**Fig. S6** Photograph of B-SBA/PMMA, G-SBA/PMMA, and R-SBA/PMMA composite films with varying thicknesses stacked together to construct a white-light-emitting composite film.

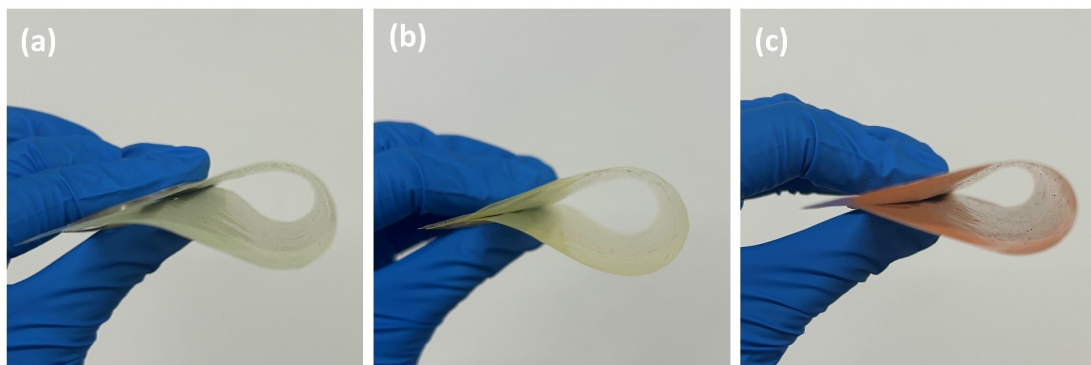

**Fig. S7** Photograph of (a-c) B-SBA/PMMA, G-SBA/PMMA, and R-SBA/PMMA composite films with under bending.

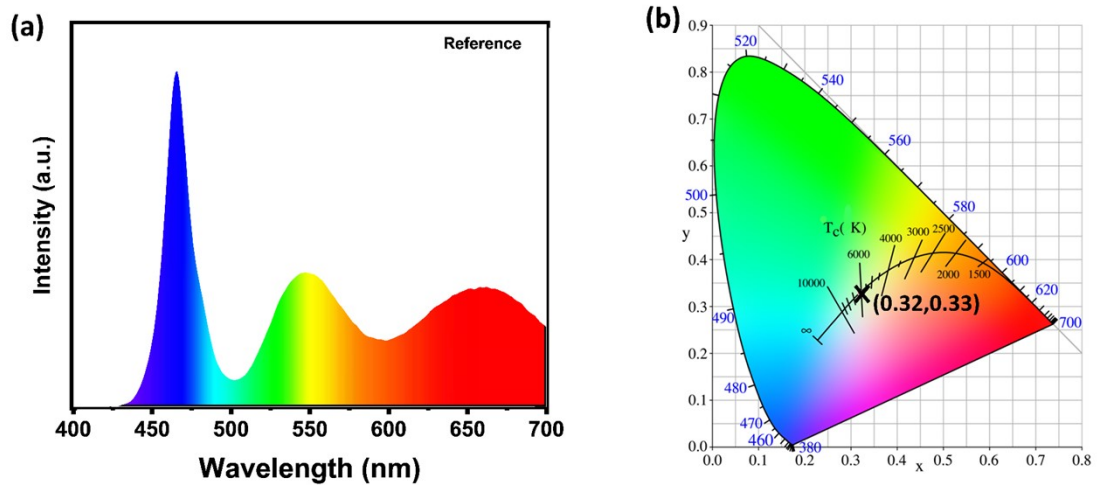

**Fig. S8** (a) PL spectrum of the WLED fabricated by the reference phosphor. (b) CIE coordinates of the WLED containing a reference sample.
